# Supplementary material for: Self-tolerance curtails the B cell repertoire to microbial epitopes
Source: JCI journal article supplement (doi:10.1172/jci.insight.122551), 2019-05-15
Supplement: sd1 [file 1]

A

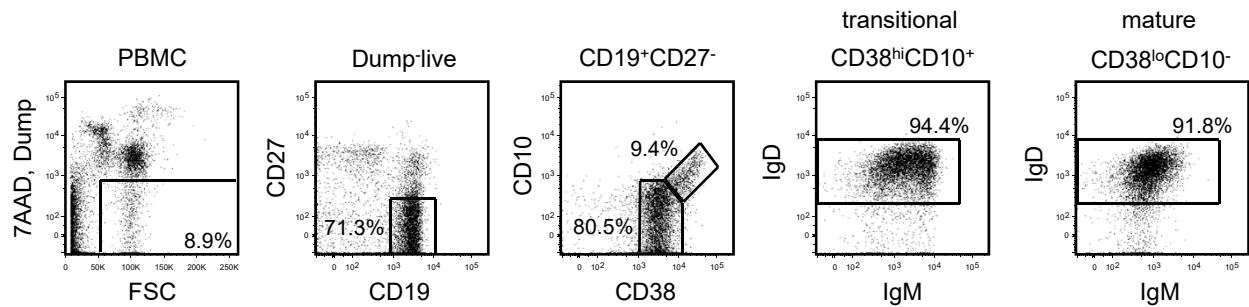

B

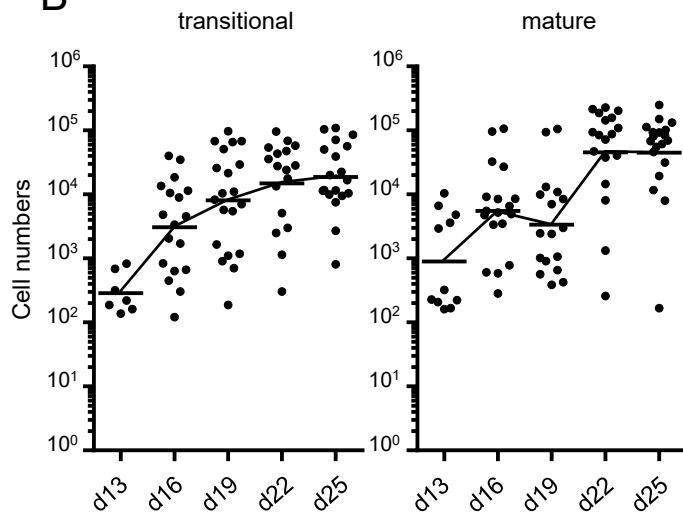

C

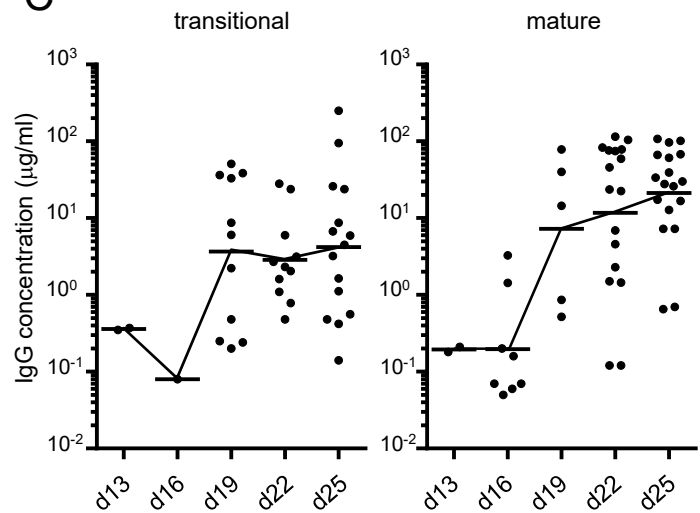

**Figure S1. Kinetics of B-cell growth and IgG production from single sorted transitional and mature B cells.**

Single B cells were sorted directly into individual wells and cultured in the presence of MS40L<sup>lo</sup> feeder cells with exogenous recombinant human IL-2, IL-4, IL-21, and BAFF. (A) Representative flow plots showing the gating strategy used to isolate transitional B (CD19<sup>+</sup>CD27<sup>-</sup>CD38<sup>hi</sup>CD10<sup>+</sup>IgD<sup>+</sup>) and mature naïve B cells (CD19<sup>+</sup>CD27<sup>-</sup>CD38<sup>lo</sup>CD10<sup>-</sup>IgD<sup>+</sup>) from PBMCs of healthy controls. (B and C) Kinetics of B-cell numbers (B) and IgG concentrations in culture supernatants (C) during single B-cell cultures for transitional and mature B cells. We analyzed 22 individual cultures for each time point. Data shown are values for samples that exceeded the background for cell counting and IgG determinations.

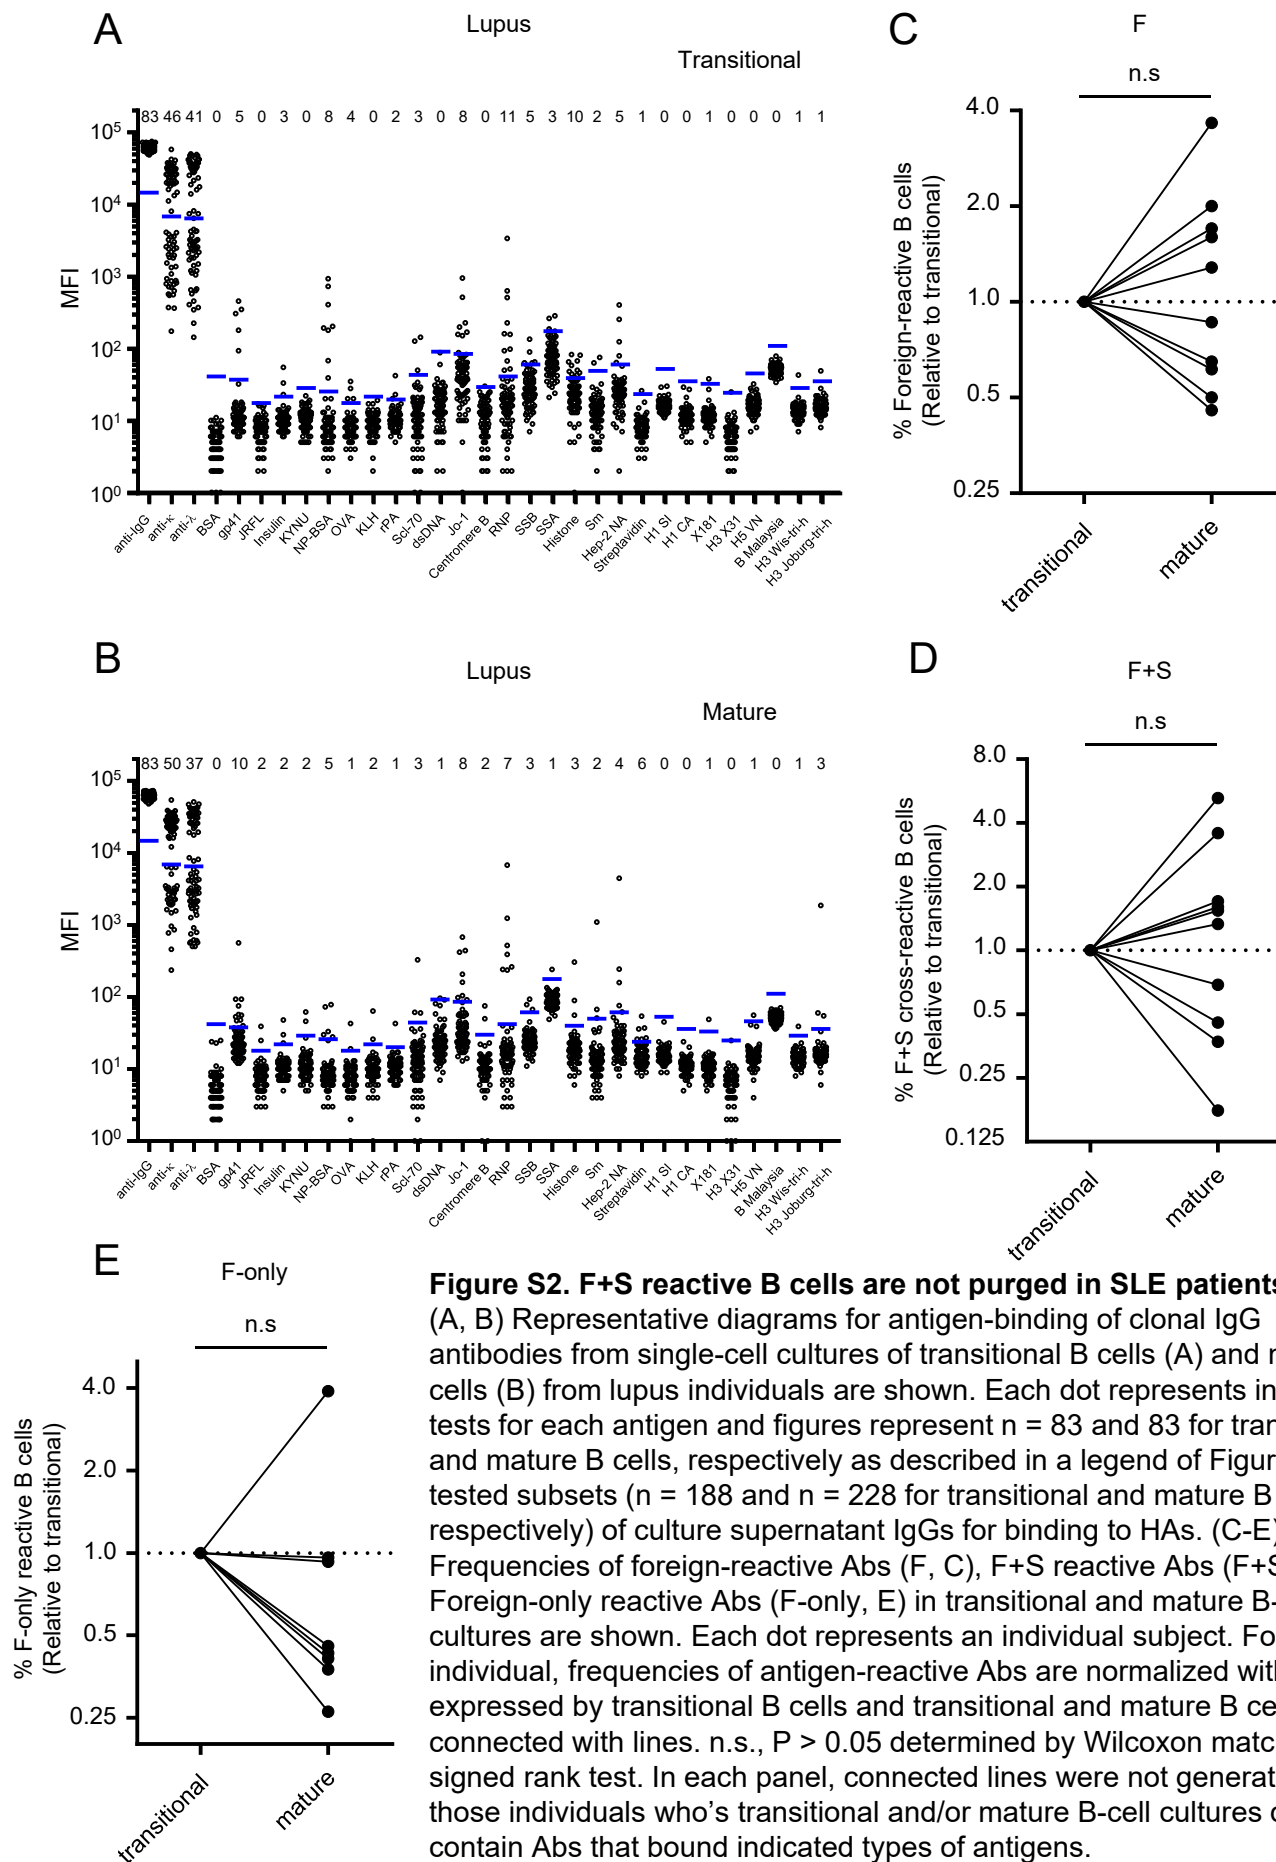

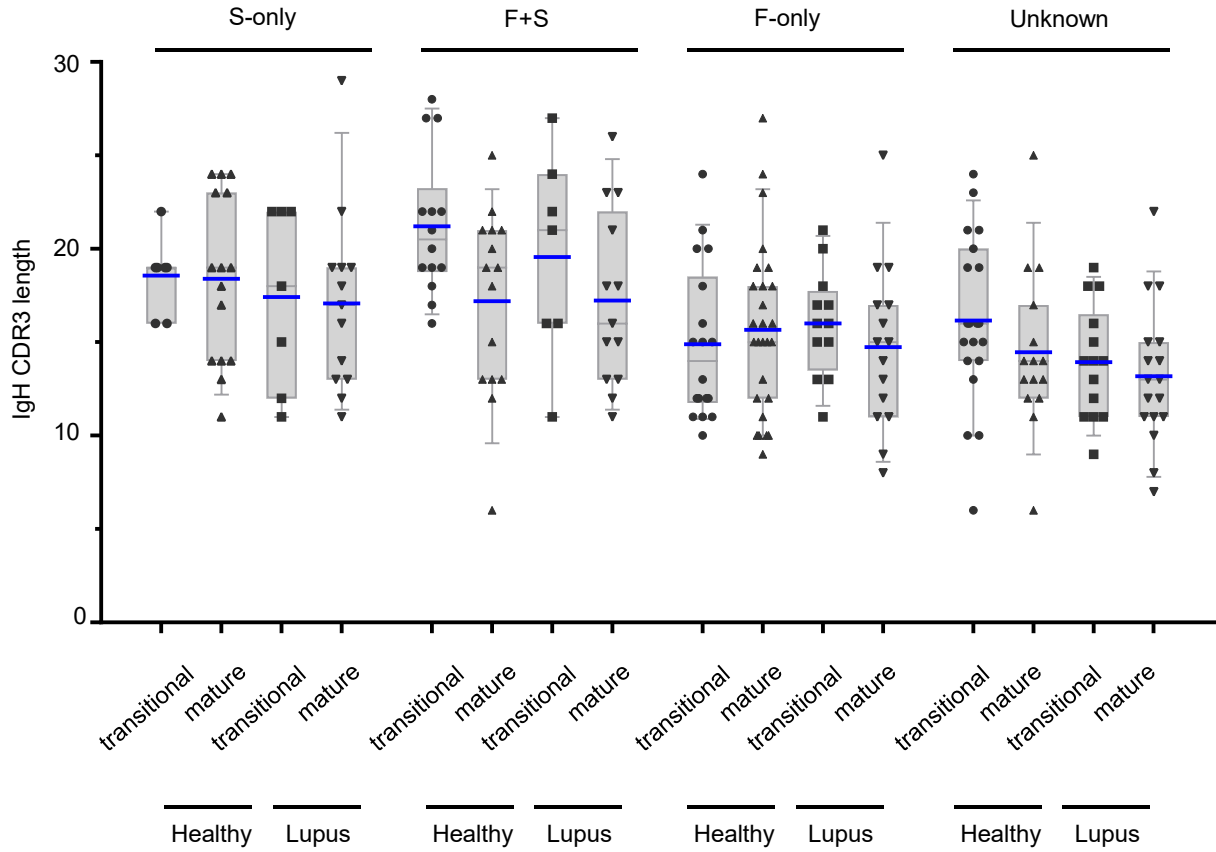

**Figure S3. Self-reactive Abs exhibit long HCDR3.**

$V_HDJ_H$  rearrangements were recovered from transitional and mature B cells after single B-cell culture (see the legend of Fig. 6). S-only,  $n = 42$ ; F+S,  $n = 49$ ; F-only,  $n = 72$ ; and Unknown,  $n = 67$ . Each dot represents an individual sample. Keys: transitional (●, ■) and mature B cells (▲, ▼) from healthy donors and from lupus patients, respectively. Blue bars, mean. Boxes extend from the 25<sup>th</sup> to 75<sup>th</sup> percentiles and bars represent the range (10<sup>th</sup>/90<sup>th</sup> percentile) of values.

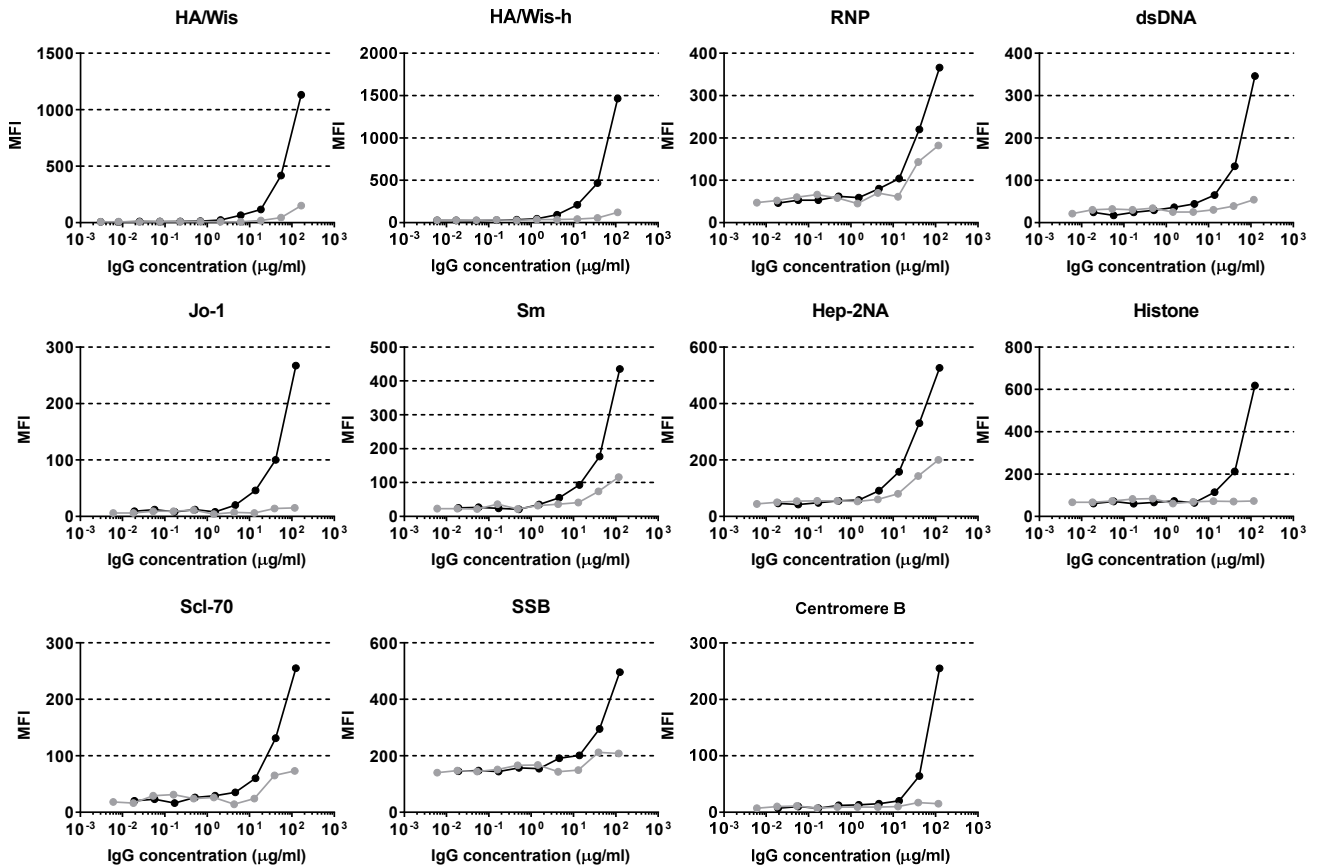

**Figure S4. Binding to a panel of foreign and self-antigens by F+S reactive IgG (Ab5).** Various concentrations Ab5 (black) or isotype-matched, control IgGs (151K or K03.12) were incubated with a panel of foreign and self-antigens conjugated with beads and binding to individual antigens were determined by Luminex multiplex assay. As K03.12 avidly binds to HA/Wis and HA/Wis-h, 151K was used as negative controls for binding to HA/Wis and HA/Wis-h. Representative data from two independent experiments are shown.

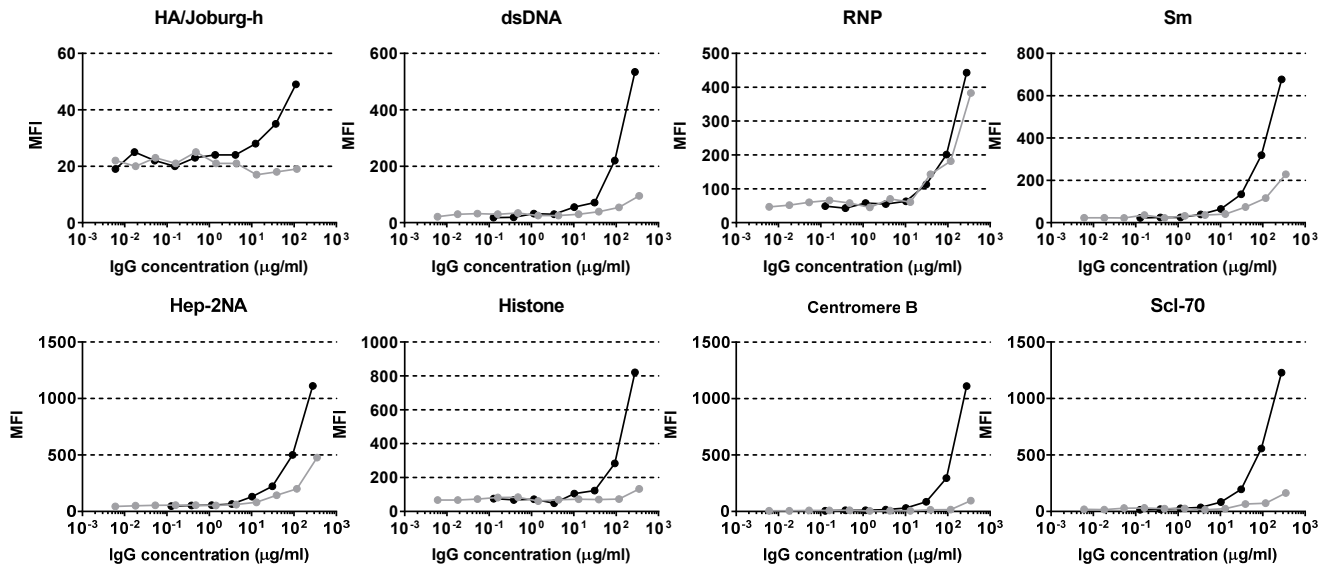

**Figure S5. Binding to a panel of foreign and self-antigens by F+S reactive IgG (Ab6).**

Various concentrations Ab6 (black) or isotype-matched, control IgGs (K03.12) were incubated with a panel of foreign and self-antigens conjugated with beads and binding to individual antigens were determined by Luminex multiplex assay. Representative data from two independent experiments are shown.

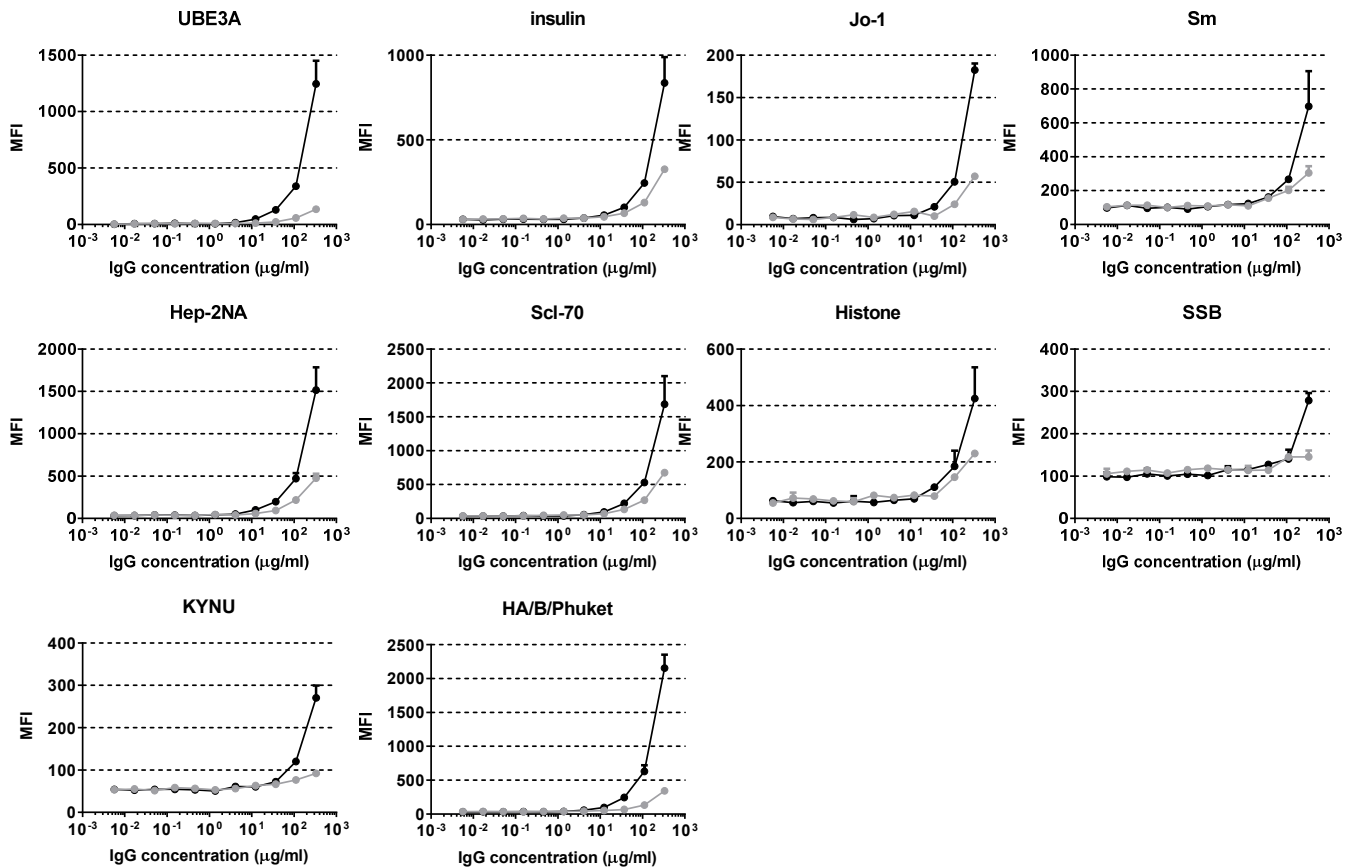

**Figure S6. Binding to a panel of foreign and self-antigens by F+S reactive IgG (Ab9).**

Various concentrations Ab9 (black) or isotype-matched, control IgGs (K03.12) were incubated with a panel of foreign and self-antigens conjugated with beads and binding to individual antigens were determined by Luminex multiplex assay. Representative data from two independent experiments are shown.

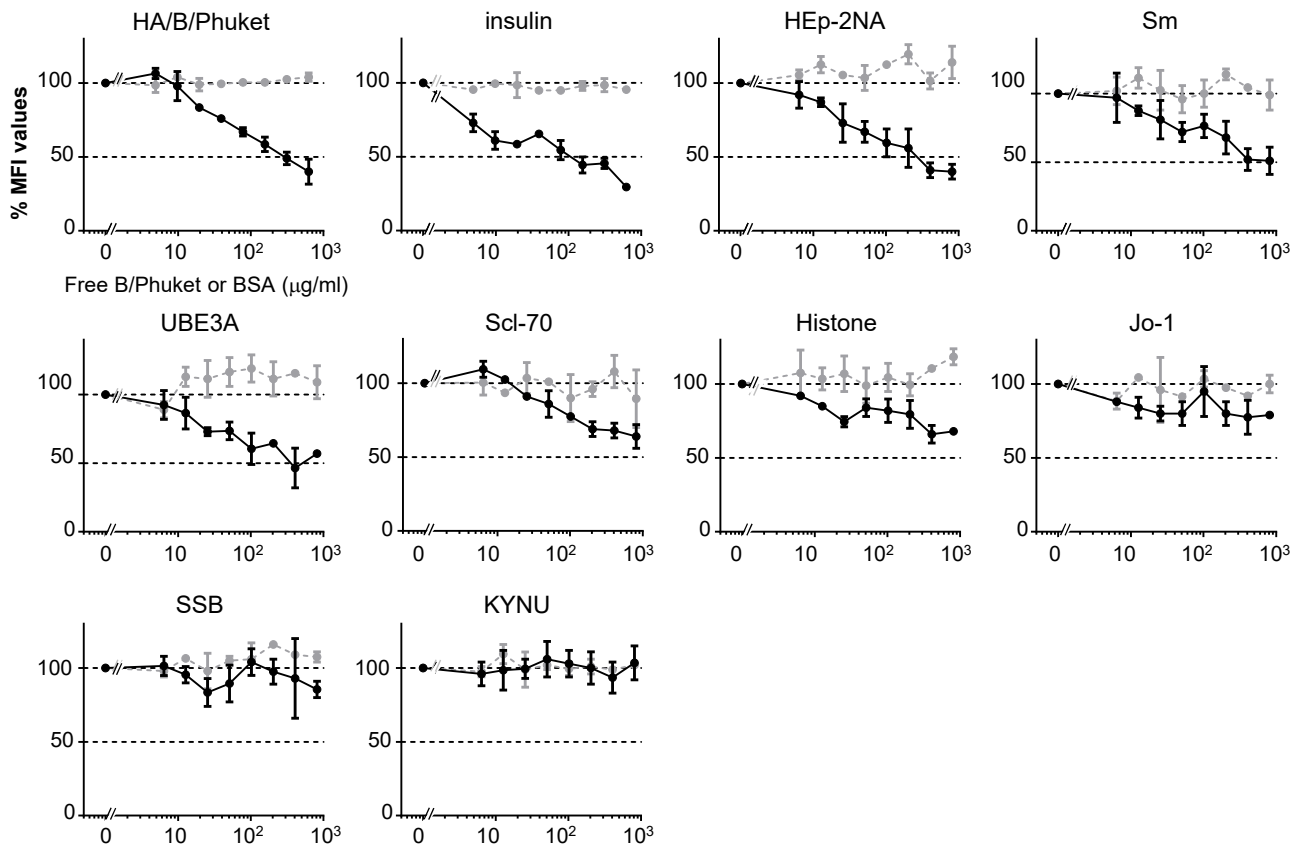

**Figure S7. Inhibition of F+S reactive IgGs by free foreign antigens.**

F+S reactive IgG (Ab9) were incubated with various concentrations of free, either specific or irrelevant (BSA) foreign antigens, and then bindings to foreign antigens (homologous inhibition) and self-antigens (heterologous inhibition) were assessed by Luminex multiplex assay. Fixed concentrations of Ab9 (400  $\mu\text{g/ml}$ ) were first incubated with indicated concentrations of free HA/B Phuket (black lines) or BSA (gray lines), and then these mixtures were added to a panel of antigen-bead conjugates. MFI values on each antigen/bead conjugate were normalized with those without free antigens that were set as 100%. The Ab9 bound HA/B Phuket, and human self-antigens, including insulin, HEp-2 NA, Sm, UBE3A, Scl-70, Histone, Jo-1, SSB, and KYNU (Fig. S6).

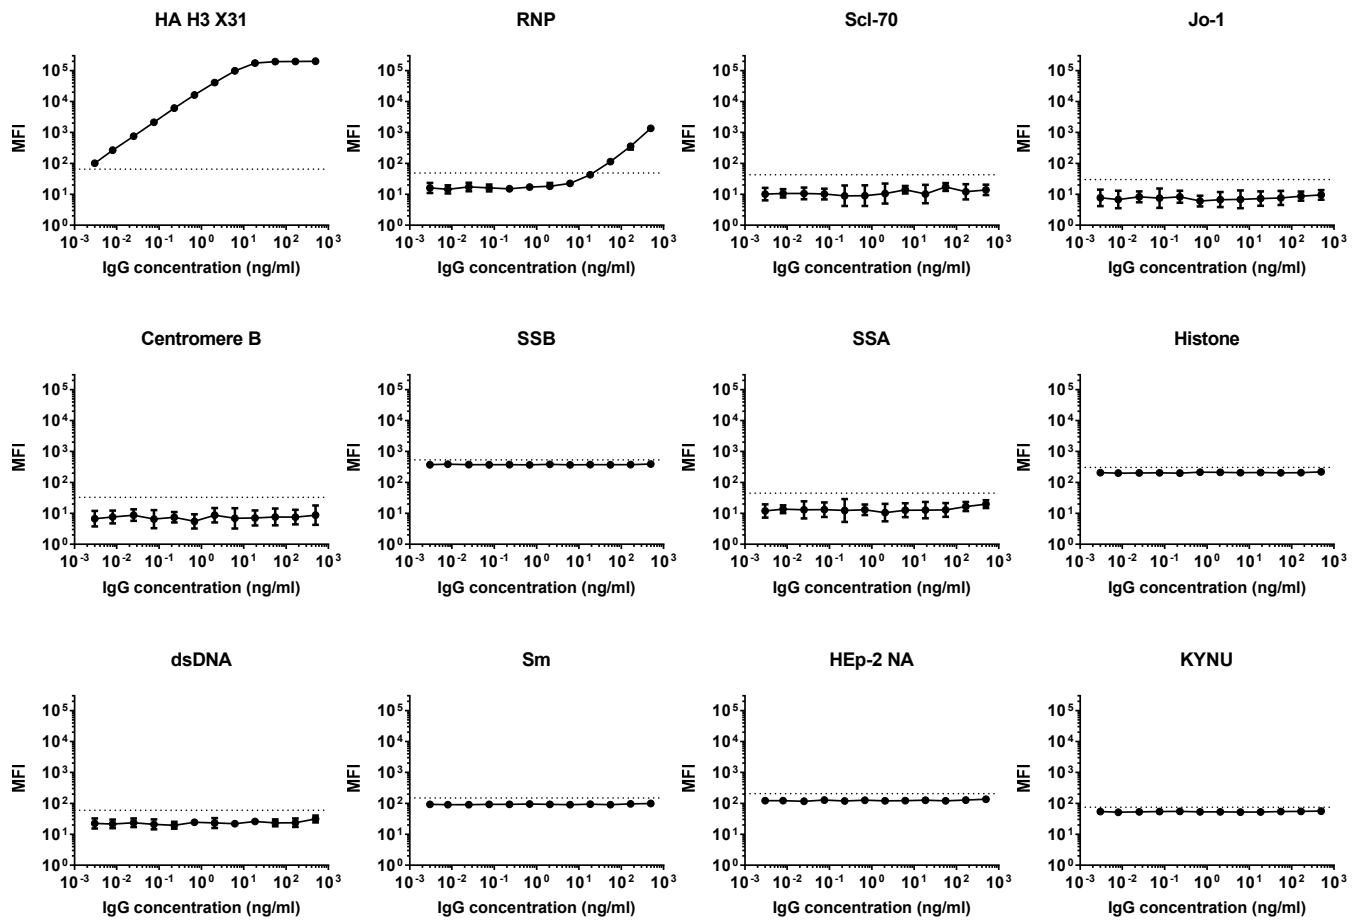

**Figure S8. HC19 binds HA H3 X31 and RNP.**

Serially diluted, influenza HA-specific monoclonal antibody (HC19, black lines,  $n = 14$ ) were tested for binding to self-antigens, including AtheNA autoantigens and KYNU. Dotted lines (gray) represent threshold median fluorescence intensity (MFI) values established for individual antigens (mean + 6SD MFI of B-cell negative mock cultures). HC19, starting at  $0.5 \mu\text{g/ml}$  and 3-fold, 12 serial dilutions. Shown are geometric mean of individual MFI values  $\pm$  geometric SD.



Table S1. Number of antigen-reactive BCRs/antibodies.

| Antigen      | Healthy                   |                     | Lupus                     |                     |
|--------------|---------------------------|---------------------|---------------------------|---------------------|
|              | Transitional<br>(n = 429) | Mature<br>(n = 654) | Transitional<br>(n = 506) | Mature<br>(n = 742) |
| Scl-70       | 2                         | 2                   | 7                         | 7                   |
| dsDNA        | 3                         | 7                   | 1                         | 9                   |
| Jo-1         | 40                        | 39                  | 35                        | 44                  |
| Centromere B | 6                         | 4                   | 4                         | 7                   |
| RNP          | 52                        | 63                  | 31                        | 47                  |
| SSB          | 25                        | 9                   | 12                        | 14                  |
| SSA          | 17                        | 13                  | 6                         | 6                   |
| Histone      | 40                        | 20                  | 21                        | 21                  |
| Sm           | 5                         | 3                   | 3                         | 9                   |
| Hep2NA       | 13                        | 9                   | 8                         | 17                  |
| KYNU         | 3                         | 5                   | 1                         | 11                  |
| Insulin      | 10                        | 3                   | 8                         | 15                  |
| gp41 mn      | 53                        | 54                  | 31                        | 43                  |
| Streptavidin | 2                         | 7                   | 1                         | 18                  |
| gp140 JR-FL  | 3                         | 3                   | 1                         | 10                  |
| NP-BSA       | 38                        | 35                  | 31                        | 36                  |
| KLH          | 7                         | 3                   | 0                         | 8                   |
| OVA          | 8                         | 5                   | 5                         | 12                  |
| rPA          | 14                        | 11                  | 9                         | 18                  |
| HAs          | 6                         | 3                   | 4                         | 6                   |

Culture supernatant IgGs from single-cell cultures of indicated B-cell subsets were screened against a panel of self-antigens and foreign antigens in Luminex assay (see also legends of Figures 1 and S2. For each antigen and for each B-cell type, number of antigen-reactive BCRs (as culture supernatant IgGs) is shown.
